# Supplementary material for: Phase I studies of AZD1208, a proviral integration Moloney virus kinase inhibitor in solid and haematological cancers
Source: PubMed Central journal article supplement (PMC5988656; doi:10.1038/s41416-018-0082-1), 2018-05-16

**A**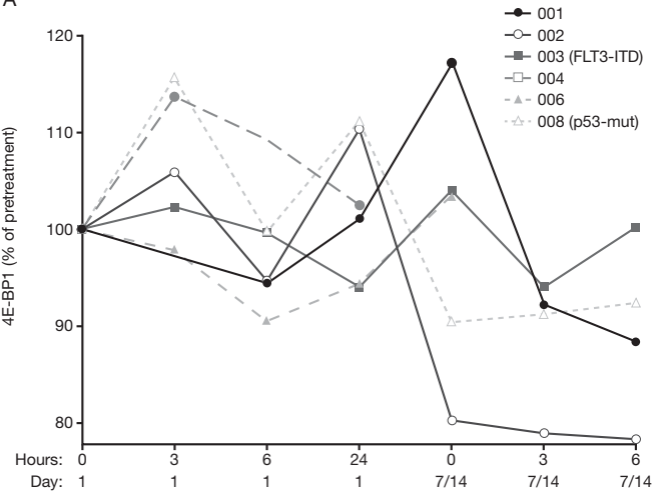**B**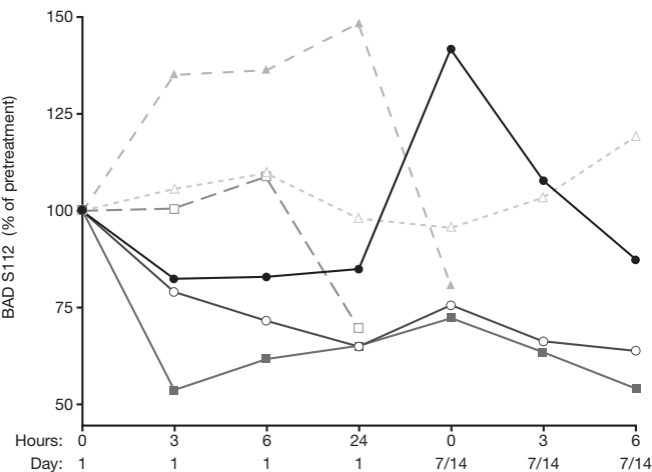

Supplement: 41416_2018_82_MOESM5_ESM.pdf [file 41416_2018_82_MOESM5_ESM.pdf]
